# Supplementary material
Source: Springer Nature journal article supplement (https://www.springermedizin.de/resource/supplementary/12913_2009_1052_MOESM1_ESM.pdf/9536222)

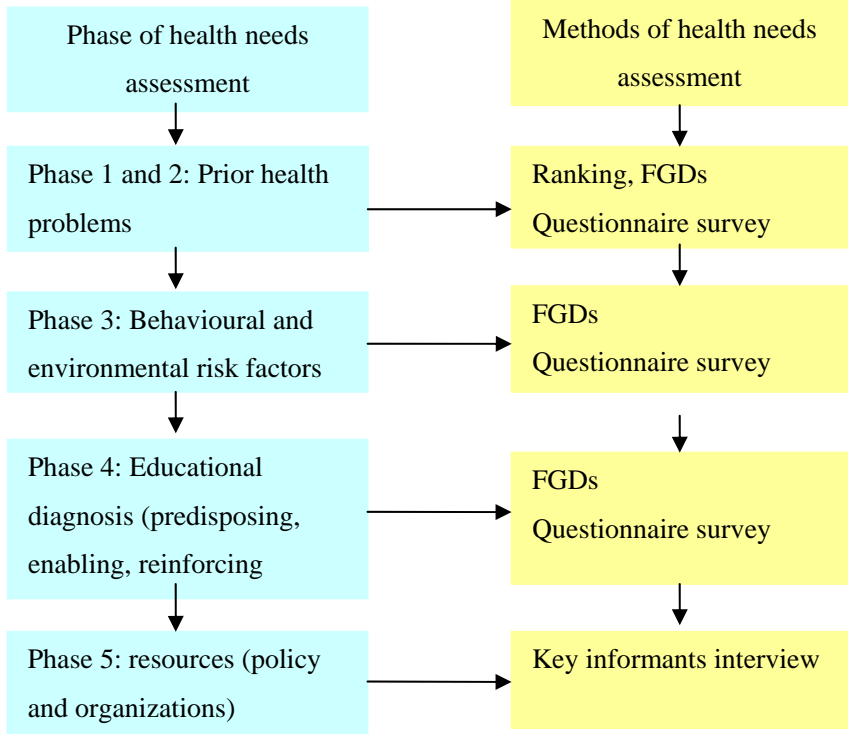

Supplement: MOESM1 [file 9536222]
